# Supplementary material for: DNA Methylation and Histone Modifications Regulate De Novo Shoot Regeneration in Arabidopsis by Modulating WUSCHEL Expression and Auxin Signaling
Source: PLoS Genet. 2011 Aug 18;7(8):e1002243. doi: 10.1371/journal.pgen.1002243 (PMC3158056; doi:10.1371/journal.pgen.1002243)
Supplement: Table S5 — List of 308 genes showing more than two fold difference both between S6 and S0 and between M0 and S0. (XLS) [file pgen.1002243.s009.xls]

## Sheet: Sheet1
Table S5. List of 308 genes showing more than two fold difference both between S6 and S0 and between M0 and S0.
Probe Set ID	Representative Public ID	S6 vs. S0 Fold Change	S6 vs. S0 q-value(%)	M0 vs. S0-Fold Change	M0 vs. S0-q-value(%)	S0-1	S0-2	S0-3	S6-1	S6-2	S6-3	M0-1	M0-2	M0-3	Target Description
267635_at	At2g42220	10.6418	0	2.2686	0	45.9197	43.0925	41.8115	491.007	497.611	403.587	86.6454	104.633	105.502	rhodanese-like family protein ;supported by full-length cDNA: Ceres:1382.
267613_at	At2g26700	2.0192	0	2.8294	0	38.0099	71.4649	107.106	130.949	148.029	158.344	218.734	221.819	172.236	putative second messenger-dependent protein kinase
267526_at	At2g30570	6.8136	0	3.0309	0	160.892	149.884	183.321	1174.41	1234.69	957.485	489.325	494.162	514.082	photosystem II reaction center 6.1KD protein ;supported by full-length cDNA: Ceres:34999.
267472_at	At2g02850	5.0908	0	3.8997	0	49.1597	44.4594	56.452	253.995	253.274	256.719	196.542	193.674	195.012	putative basic blue protein (plantacyanin) ; supported by full-length cDNA: Ceres: 10750.
267452_at	At2g33860	2.6403	0	2.2936	0	143.526	117.602	102.08	297.92	336.949	324.12	264.029	307.212	261.818	auxin response transcription factor 3 (ETTIN/ARF3) identical to GB:AF007788; supported by cDNA: gi_12484198_gb_AF336917.1_AF336917
267384_at	At2g44370	3.2501	0	2.6642	0	23.4336	20.7058	23.6778	67.3463	78.0232	75.0408	58.6396	60.9526	61.0859	unknown protein highly similar to GP|2435515|AF024504
267238_at	At2g44130	7.932	0	2.1937	0	63.204	52.3199	50.2161	506.551	423.196	384.908	110.087	125.737	127.766	unknown protein ;supported by full-length cDNA: Ceres:6950.
267172_at	At2g37660	5.8984	0	2.0281	0	84.9469	96.1475	101.109	539.761	609.219	515.563	192.127	199.264	180.944	unknown protein ;supported by full-length cDNA: Ceres:13797.
267157_at	At2g37630	3.0501	0	2.0573	0	123.378	108.701	121.887	375.104	334.836	369.706	222.734	255.762	249.728	putative MYB family transcription factor ; supported by cDNA: gi_5823324_gb_AF175996.1_AF175996
267076_at	At2g41090	3.4108	0	2.8376	0	34.5459	37.5738	35.0885	129.821	113.203	122.646	99.9509	108.788	95.47	calcium binding protein (CaBP-22) identical to GB:Z12136;supported by full-length cDNA: Ceres:123659.
267012_at	At2g39220	2.9724	0	4.1577	0	85.9517	77.4844	79.1812	234.811	258.658	227.675	340.304	310.135	358.285	similar to latex allergen from Hevea brasiliensis
267002_s_at	At2g34430	3.9022	0	2.3703	0	455.147	359.246	404.382	1689.32	1526.44	1540.13	868.336	924.263	1096.21	putative photosystem II type I chlorophyll a b binding protein. ; supported by full-length cDNA: Ceres: 23727.
266993_at	At2g39210	2.2926	0	2.2369	0	108.01	105.168	91.7832	229.562	217.064	252.518	232.684	241.765	207.704	nodulin-like protein ; supported by cDNA: gi_16930478_gb_AF419593.1_AF419593
266929_at	At2g45850	10.769	0	4.1525	0	14.3368	11.8733	14.9807	138.425	155.849	149.311	52.8847	64.0465	54.1137	putative AT-hook DNA-binding protein ; supported by cDNA: gi_14194130_gb_AF367271.1_AF367271
266790_at	At2g28950	2.4806	0	2.0233	0	457.953	436.334	396.299	1067.68	1115.54	1018.22	851.46	861.372	898.397	expansin AtEx6 identical to GB U30480; supported by full-length cDNA: Ceres: 17914.
266673_at	At2g29630	4.4411	0	2.8416	0	28.9752	26.1161	32.682	132.261	137.116	120.433	90.6433	65.6889	93.0884	putative thiamin biosynthesis protein
266636_at	At2g35370	11.8061	0	4.7134	0	37.6539	29.0336	35.7703	429.715	450.537	329.373	152.501	155.853	174.569	glycine decarboxylase complex H-protein identical to GB:U27144;supported by full-length cDNA: Ceres:24194.
266635_at	At2g35470	2.2085	0	2.2212	0	80.8677	67.1663	70.7736	179.172	154.251	149.817	136.932	165.727	183.358	unknown protein ;supported by full-length cDNA: Ceres:13821.
266551_at	At2g35260	4.781	0	2.4102	0	69.6932	59.1946	53.5467	308.528	287.559	276.127	135.563	167.673	136.464	unknown protein ; supported by cDNA: gi_13605586_gb_AF361619.1_AF361619
266473_at	At2g31120	2.0956	0	2.3855	0	90.123	79.8934	74.2794	160.879	167.315	183.748	165.979	212.584	204.201	unknown protein
266425_at	At2g41300	2.9899	0	3.1768	0	29.9426	37.407	32.1182	100.644	94.414	102.339	111.679	102.378	101.932	putative strictosidine synthase
266421_at	At2g38540	4.5766	0	3.1086	0	629.025	575.26	791.702	2982.55	3199.77	2952.5	2078.89	2049.67	2076.22	putative nonspecific lipid-transfer protein ; supported by cDNA: gi_15146309_gb_AY049296.1_
266325_at	At2g46630	3.8979	0	3.2762	0	18.1263	23.1011	20.1805	72.7551	91.3456	75.2615	69.2081	64.3161	67.6612	putative extensin
266309_at	At2g27140	3.4181	0	5.1814	0	28.1367	29.9287	25.6791	105.84	100.505	79.9002	134.955	138.014	160.941	unknown protein ;supported by full-length cDNA: Ceres:30446.
265998_at	At2g24270	23.9855	0	3.0937	0	17.089	20.7112	24.6501	486.783	516.951	494.17	68.2593	63.1168	61.8277	putative NADP-dependent glyceraldehyde-3-phosphate dehydrogenase ; supported by cDNA: gi_14335051_gb_AY037205.1_
265872_at	At2g01670	3.307	0	2.4301	0	152.902	187.521	164.715	672.515	473.54	524.453	381.441	406.327	439.783	unknown protein ;supported by full-length cDNA: Ceres:8247.
265741_at	At2g01320	2.0104	0	2.0798	0	70.8583	66.6145	72.0804	142.998	137.387	140.904	142.976	140.121	152.726	putative membrane transporter ; supported by cDNA: gi_13605838_gb_AF367318.1_AF367318
265722_at	At2g40100	8.4884	0	3.8321	0	43.4408	32.4006	35.3755	301.225	308.225	334.605	125.182	161.561	139.447	putative chlorophyll a/b binding protein ; supported by full-length cDNA: Ceres: 6454.
265611_at	At2g25510	18.0806	0	22.1451	0	15.2192	26.6948	24.8114	446.394	281.69	478.354	495.107	483.246	499.286	unknown protein ;supported by full-length cDNA: Ceres:10730.
265387_at	At2g20670	3.7476	0	2.6023	0	123.719	110.646	118.079	519.59	382.17	419.053	344.526	308.946	263.685	unknown protein ;supported by full-length cDNA: Ceres:34827.
265374_at	At2g06520	4.3549	0	2.3177	0	302.124	318.012	355.696	1372.71	1558.2	1318.78	741.271	728.244	792.165	hypothetical protein ;supported by full-length cDNA: Ceres:14272.
265287_at	At2g20260	5.0941	0	2.56	0	132.371	151.669	167.696	785.672	795.099	720.396	387.427	389.174	379.838	putative photosystem I reaction center subunit IV ;supported by full-length cDNA: Ceres:27629.
265149_at	At1g51400	3.4971	0	2.1029	0	336.09	263.757	339.9	1043.76	1083.16	1159.5	604.16	693.885	678.113	unknown protein ; supported by full-length cDNA: Ceres: 12055.
265116_at	At1g62480	2.611	0	2.8325	0	398.872	495.398	410.943	1561.37	983.187	863.341	1431.72	1136.31	1128.95	unknown protein ; supported by full-length cDNA: Ceres: 29227.
265073_at	At1g55480	3.3299	0	2.2904	0	45.1459	48.1216	48.3476	163.906	171.944	135.714	99.0617	111.952	113.34	unknown protein similar to putative tyrosine phosphatase GB:AAF81798 GI:8926334 from [Oryza sativa];supported by full-length cDNA: Ceres:8301.
265067_at	At1g03850	3.9572	0	2.9784	0	42.9058	48.7538	43.4662	202.664	172.233	159.824	117.477	141.953	143.035	hypothetical protein predicted by genefinder;supported by full-length cDNA: Ceres:271253.
264839_at	At1g03630	4.7314	0	3.3583	0	16.5519	17.4576	16.4978	81.3064	100.62	57.0444	52.6245	52.7192	64.2726	putative protochlorophyllide reductase similar to protochlorophyllide reductase precusor; similar to ESTs gb|R30630, gb|T46162, emb|Z26728, gb|AA042736, and gb|AA042730;supported by full-length cDNA: Ceres:7573.
264837_at	At1g03600	4.5153	0	2.2418	0	215.729	189.706	205.943	990.351	967.662	802.519	432.556	452.56	485.471	unknown protein similar to ESTs emb|Z27038, gb|AA451546, emb|Z29876, gb|T45359 and gb|R90316;supported by full-length cDNA: Ceres:111449.
264824_at	At1g03420	2.4264	0	11.2627	0	43.8219	39.652	39.3087	95.6653	111.257	91.0011	408.365	515.449	459.056	unknown protein similar to gb|T45484, emb|Z30724, and emb|Z30531
264653_at	At1g08980	3.2587	0	2.264	0	68.9414	58.9551	68.3398	215.271	221.537	202.666	138.592	146.022	159.667	unknown protein Contains similarity to Rhodococcus amidase (gb|D16207). ESTs gb|T20504,gb|H36650,gb|N97423,gb|H36595 come from this gene; supported by cDNA: gi_14335037_gb_AY037198.1_
264545_at	At1g55670	5.5921	0	3.0337	0	252.873	219.347	269.28	1404.07	1437.02	1305.48	720.7	740.449	788.327	photosystem I subunit V precursor, putative similar to photosystem I subunit V precursor GB:CAB52748 GI:5734520 from [Arabidopsis thaliana]; supported by cDNA: gi_13265559_gb_AF324710.2_AF324710
264474_s_at	At1g67090	5.2527	0	2.7866	0	655.182	548.45	700.502	3481.1	3430.4	3090.33	1785.53	1662.05	1858.56	ribulose-bisphosphate carboxylase small unit, putative similar to ribulose-bisphosphate carboxylase small unit GI:406726 from (Brassica napus); supported by cDNA: gi_11762169_gb_AF325011.1_AF325011
264204_at	At1g22710	5.6122	0	2.4645	0	55.8894	59.1423	56.5219	347.506	335.265	280.023	134.902	140.297	147.591	putative sucrose transport protein, SUC2 strong similarity to GB:S38196 sucrose transport protein SUC2 from [Arabidopsis thaliana];supported by full-length cDNA: Ceres:7894.
264200_at	At1g22650	2.1416	0	2.1273	0	39.9839	40.1468	34.6196	76.915	88.5654	80.2672	82.8652	76.9841	84.2647	putative invertase Similar to LIM17 gene product gb|1653769 from the genome of Synechocystis sp. gb|D90916;supported by full-length cDNA: Ceres:6399.
264185_at	At1g54780	4.5052	0	2.3675	0	105.74	120.734	134.621	566.946	551.927	507.926	248.686	322.009	284.203	unknown protein ;supported by full-length cDNA: Ceres:3853.
264092_at	At1g79040	4.3401	0	2.7073	0	340.603	399.851	438.068	1716.41	1817.96	1580.55	1041.32	1042.36	1106.88	photosystem II polypeptide, putative similar to photosystem II polypeptide GI:967967 from [Brassica rapa];supported by full-length cDNA: Ceres:110067.
263840_at	At2g36885	2.7191	0	2.2796	0	63.2723	76.64	75.9991	190.877	206.835	189.364	162.112	166.747	163.334	Expressed protein ; supported by full-length cDNA: Ceres: 29157.
263787_at	At2g46420	2.1613	0	2.066	0	46.1168	45.1089	48.5223	105.626	98.0028	98.4114	91.5394	101.376	95.8023	unknown protein ; supported by cDNA: gi_15450510_gb_AY052357.1_
263783_at	At2g46400	2.0056	0	3.7292	0	59.1156	49.0842	52.4106	108.212	90.2526	123.653	180.122	192.684	226.15	putative WRKY-type DNA binding protein ; supported by cDNA: gi_15430276_gb_AY046275.1_
263761_at	At2g21330	6.449	0	3.8641	0	62.4483	47.5479	53.3997	327.424	371.504	354.805	181.491	226.271	223.619	putative fructose bisphosphate aldolase ; supported by cDNA: gi_14334739_gb_AY035043.1_
263750_at	At2g21530	8.8571	0	3.0823	0	24.4862	21.9722	23.4506	210.71	245.768	162.714	69.6757	73.3335	72.4681	unknown protein
263676_at	At1g09340	4.9715	0	2.4151	0	36.4611	40.5404	40.7583	189.01	214.29	182.148	88.8859	100.905	94.6153	putative RNA-binding protein Identical to gb|Y10557 g5bf gene from Arabidopsis thaliana. ESTs gb|R30578, gb|R90475, gb|T22384, gb|T22425, gb|N64934 and gb|T46767 come from this gene;supported by full-length cDNA: Ceres:37028.
263557_at	At2g16400	2.9219	0	3.8583	0	65.0399	59.6273	63.3891	169.868	201.469	178.14	241.084	243.079	241.41	putative homeodomain transcription factor ; supported by cDNA: gi_15983780_gb_AY056796.1_
263478_at	At2g31880	2.1394	0	2.5606	0	69.1361	74.9761	79.9702	167.412	141.581	170.42	189.389	185.421	198.984	putative receptor-like protein kinase ; supported by cDNA: gi_16648754_gb_AY058153.1_
263467_at	At2g31730	2.8965	0	2.6738	0	56.3065	42.3481	47.5279	169.623	143.059	110.731	116.316	118.312	156.231	unknown protein
263183_at	At1g05570	3.9995	0	2.2605	0	87.7132	90.9072	87.4805	336.164	354.704	373.402	211.589	191.128	198.792	putative glucan synthase Highly similar to putative glucan synthase GB:AAD15408; supported by cDNA: gi_13649387_gb_AF237733.1_AF237733
263179_at	At1g05710	3.2582	0	3.2203	0	168.025	135.876	156.538	496.554	517.763	485.865	470.008	518.366	494.355	unknown protein similar to unknown protein GB:AAD24850;supported by full-length cDNA: Ceres:3900.
263048_s_at	At2g05310	4.6039	0	2.5587	0	41.6012	43.9177	55.87	216.746	242.326	191.874	119.818	112.794	129.153	unknown protein ;supported by full-length cDNA: Ceres:5198.
263046_at	At2g05380	7.3829	0	2.0479	0	60.8641	49.9221	60.7341	435.876	532.091	298.353	107.228	119.778	124.257	unknown protein ; supported by cDNA: gi_15146251_gb_AY049267.1_
262958_at	At1g54410	4.4761	0	3.0662	0	249.109	249.208	332.967	1346.01	1295.27	1079.59	844.311	853.275	851.311	water stress-induced protein, putative similar to water stress-induced protein, GI:454880 from [Oryza sativa]; supported by full-length cDNA: Ceres: 108142.
262954_at	At1g54500	4.7049	0	2.4731	0	67.7466	65.7636	80.9951	326.936	362.979	319.319	170.181	168.102	192.216	rubredoxin, putative similar to rubredoxin GI:4583668 from [Guillardia theta];supported by full-length cDNA: Ceres:19234.
262921_at	At1g79430	3.7833	0	2.8789	0	19.6804	18.0241	19.1081	70.3861	81.2323	63.318	55.1386	52.8008	55.6174	transfactor, putative similar to transfactor GI:4519671 from [Nicotiana tabacum]; supported by cDNA: gi_15010721_gb_AY045662.1_
262843_at	At1g14687	2.4861	0	2.905	0	27.7664	24.9139	27.3889	67.7791	66.2339	65.0509	68.2904	76.325	87.9858	Expressed protein ; supported by full-length cDNA: Ceres: 25577.
262644_at	At1g62710	2.1015	0	2.1035	0	48.1128	62.6638	70.8636	110.106	131.936	139.674	125.251	131.2	125.625	beta-VPE nearly identical to beta-VPE GB:BAA09615 GI:1805364 [Arabidopsis thaliana]; supported by cDNA: gi_14194096_gb_AF367254.1_AF367254
262615_at	At1g13950	2.6818	0	2.3536	0	36.3562	39.0972	37.9525	105.519	116.308	82.3087	76.3826	93.5681	96.9631	initiation factor 5A-4 identical to initiation factor 5A-4 GB:AAD39281 GI:5080771 from (Arabidopsis thaliana); supported by cDNA: gi_12407784_gb_AF296082.1_AF296082
262609_at	At1g13930	3.1284	0	4.622	0	226.693	265.656	331.968	764.673	1082.16	731.983	1254.05	1227.36	1328.58	unknown protein ;supported by full-length cDNA: Ceres:1505.
262557_at	At1g31330	4.9651	0	3.1104	0	349.927	273.04	316.616	1639.36	1547.63	1478.09	926.536	1009.77	986.198	photosystem I subunit III precursor, putative similar to photosystem I subunit III precursor GB:U08135 GI:854707 from[Hordeum vulgare];supported by full-length cDNA: Ceres:40329.
262536_at	At1g17100	5.0803	0	2.3422	0	163.745	135.876	157.834	689.204	856.835	777.948	330.178	360.629	380.632	SOUL-like protein Similar to SOUL Protein [Mus musculus] (gi|4886906) and [Homo sapiens] (gi|4886910). Location of ests PAP043 5' (gb|Z27017), PAP043 3' (gb|Z29848), 153N19T7 (gb|AA720145), and 212B8T7 (gb|N37862);supported by full-length cDNA: Ceres:29992.
262494_at	At1g21810	2.5095	0	2.2336	0	25.4085	23.121	26.7439	58.9307	72.9516	57.0194	58.3315	53.5981	56.2012	myosin-like protein similar to myosin heavy chain GB:AAD33718 GI:4928755 from (Amoeba proteus)
262456_at	At1g11260	3.224	0	2.1003	0	91.4535	107.11	98.15	356.5	337.149	262.943	211.812	205.975	205.39	glucose transporter almost identical to glucose transporter GB:P23586 from [Arabidopsis thaliana]; supported by full-length cDNA: Ceres: 33727.
262452_at	At1g11210	4.9496	0	3.0109	0	28.1511	40.6175	47.6336	197.161	251.865	127.124	109.46	124.216	116.796	hypothetical protein similar to hypothetical protein GB:AAD50003 GI:5734738 from [Arabidopsis thaliana];supported by full-length cDNA: Ceres:37592.
262374_s_at	At1g72930	4.5093	0	4.4313	0	29.5736	32.5949	26.7898	139.604	140.566	120.97	110.587	145.894	137.719	flax rust resistance protein, putative similar to flax rust resistance protein GI:4588066 from [Linum usitatissimum]; supported by full-length cDNA: Ceres: 2795.
262286_at	At1g68585	2.3188	0	2.0988	0	29.446	31.7742	28.177	71.84	73.8055	61.6461	57.1823	60.7272	69.7194	Expressed protein ; supported by full-length cDNA: Ceres: 102054.
262283_at	At1g68590	9.0804	0	3.0993	0	39.4012	36.3	33.4084	331.491	361.711	297.557	96.0984	118.376	123.686	unknown protein ;supported by full-length cDNA: Ceres:21798.
262212_at	At1g74890	3.4988	0	2.2825	0	35.7491	34.5757	32.8103	142.044	120.175	98.6289	73.6835	81.6152	80.1094	response regulator 7, putative similar to response regulator 7 GI:3953603 from [Arabidopsis thaliana]; supported by cDNA: gi_11870064_gb_AF305720.1_AF305720
261970_at	At1g65960	2.5334	0	2.4649	0	489.936	493.715	499.711	1260.3	1303.06	1194.6	1210.14	1210.22	1236	glutamate decarboxylase (gad), putative similar to glutamate decarboxylase (gad) GI:294111 from [Petunia hybrida]; supported by cDNA: gi_1184959_gb_U46665.1_ATU46665
261832_at	At1g10650	2.8539	0	2.2414	0	81.428	68.2255	68.3112	202.499	224.324	195.229	161.481	161.94	165.129	S-ribonuclease binding protein SBP1, putative similar to S-ribonuclease binding protein SBP1 GI:6760451 from [Petunia hybrida];supported by full-length cDNA: Ceres:108776.
261746_at	At1g08380	9.4782	0	3.4794	0	122.232	89.2999	109.639	1003.66	1033.08	1007.39	355.13	371.234	391.11	unknown protein ;supported by full-length cDNA: Ceres:34623.
261598_at	At1g49750	11.4334	0	9.0535	0	17.419	18.9773	21.7923	211.118	245.433	208.743	176.129	169.541	181.138	unknown protein contains similarity to extensin-like protein GB:CAA19879 GI:3297821 from [Arabidopsis thaliana]
261311_at	At1g05770	3.3559	0	5.2599	0	26.0685	28.1567	22.4418	86.0139	97.4271	73.8438	127.941	129.375	145.945	disease resistance protein RTM1, putative similar to GB:AAF14583 from [Arabidopsis thaliana] (Proc. Natl. Acad. Sci. U.S.A. 97 (1), 489-494 (2000))
261266_at	At1g26770	3.8436	0	2.3713	0	276.012	295.481	298.142	1110.28	1174.45	1057.82	660.515	652.736	748.943	expansin 10 identical to GB:AAF61712 from [Arabidopsis thaliana];supported by full-length cDNA: Ceres:14132.
261256_at	At1g05760	4.0542	0	6.0649	0	25.962	28.906	27.0411	108.302	123.154	100.621	153.89	152.908	189.972	disease resistance protein RTM1 identical to GB:AAF14583 from [Arabidopsis thaliana] (Proc. Natl. Acad. Sci. U.S.A. 97 (1), 489-494 (2000)); supported by cDNA: gi_13877528_gb_AF370465.1_AF370465
261221_at	At1g19960	4.2109	0	17.8888	0	26.8031	23.8822	34.1842	101.523	105.488	150.368	482.399	476.067	559.751	hypothetical protein predicted by genemark.hmm
261218_at	At1g20020	8.1189	0	4.3295	0	43.9643	41.7382	42.2549	359.837	366.174	312.857	168.34	202.622	183.025	ferredoxin--NADP reductase precursor, putative similar to GB:M25528 from [Mesembryanthemum crystallinum]
261197_at	At1g12900	10.4751	0	3.6144	0	118.196	95.2191	113.831	1133.58	1141.53	1152.81	372.739	408.77	401.299	putative calcium-binding protein, calreticulin similar to SP:P12858 from [Arabidopsis thaliana]
261000_at	At1g26540	2.1686	0	2.8652	0	55.3979	44.1555	46.7389	102.691	107.865	106.695	141.423	135.802	141.937	hypothetical protein predicted by genemark.hmm
260919_at	At1g21520	4.7678	0	4.1419	0	33.309	33.9108	39.2575	195.031	144.311	168.316	134.479	130.015	176.521	hypothetical protein predicted by genemark.hmm
260916_at	At1g02475	3.1151	0	2.0201	0	90.3063	77.7277	81.7862	253.032	269.663	255.509	152.934	187.084	164.645	predicted protein ; supported by cDNA: gi_13878058_gb_AF370292.1_AF370292
260704_at	At1g32470	7.7419	0	5.4932	0	112.666	96.4892	114.051	839.792	879.562	782.883	559.078	601.692	614.665	glycine cleavage system H protein precursor, putative similar to GB:Z37524 from [Flaveria anomala];supported by full-length cDNA: Ceres:23118.
260673_at	At1g19330	3.0838	0	2.3484	0	196.207	162.356	154.159	551.188	512.159	517.764	384.542	435.557	384	unknown protein ; supported by full-length cDNA: Ceres: 4026.
260460_at	At1g68230	2.2178	0	2.5684	0	32.0165	31.2425	33.469	80.5184	69.1509	64.8554	77.8541	74.7741	95.8102	unknown protein
260332_at	At1g70470	2.1552	0	3.3782	0	120.207	116.12	140.194	254.301	298.199	258.984	405.387	429.258	437.317	hypothetical protein predicted by genefinder
260277_at	At1g80520	2.2228	0	2.5726	0	33.6251	27.6457	28.2524	56.9088	81.3055	60.7803	67.3529	70.1784	92.7747	hypothetical protein predicted by genscan+
260221_at	At1g74670	10.1697	0	4.8553	0	37.6391	34.0843	41.7999	451.397	407.767	295.331	167.676	183.669	199.847	GAST1-like protein similar to GAST1 protein precursor GB:P27057 [Lycopersicon esculentum] (induced by gibberellins, inhibited by ABA Plant J 1992 Mar;2(2):153-9)
260170_at	At1g71890	3.8653	0	2.0621	0	36.335	37.6649	30.2624	144.956	141.322	116.732	71.5562	74.5678	68.8795	putative sucrose transport protein similar to sucrose transport protein SUC1 GB:S38197 from [Arabidopsis thaliana]
260112_at	At1g63310	5.6565	0	6.1168	0	23.3439	27.0127	21.0097	140.38	145.364	117.94	136.592	136.037	163.902	unknown protein similar to unknown protein GB:AAC69930 from [Arabidopsis thaliana]
260076_at	At1g73630	4.9669	0	6.3723	0	15.3597	11.2419	14.7793	71.1126	81.8292	52.5912	77.8444	92.4061	93.4427	putative calmodulin similar to calmodulin GB:P02596 [Renilla reniformis]; contains Pfam profile: PF00036 EF hand (4 copies);supported by full-length cDNA: Ceres:94584.
260014_at	At1g68010	8.3285	0	2.3537	0	54.4224	54.9414	56.5473	448.17	477.932	455.682	120.999	139.755	129.751	hydroxypyruvate reductase (HPR) identical to hydroxypyruvate reductase (HPR) GB:D85339 [Arabidopsis thaliana] (Plant Cell Physiol 1997 Apr;38(4):449-55); supported by cDNA: gi_2055272_dbj_D85339.1_D85339
259990_s_at	At1g68050	2.2247	0	3.7547	0	32.816	49.7955	46.2411	94.4233	109.527	82.7106	168.252	156.955	158.599	F-box protein FKF1/ADO3, AtFBX2a identical to FKF1 GI:6960305 and Adagio 3 GI:13487072 from [Arabidopsis thaliana]
259896_at	At1g71500	3.4785	0	2.1513	0	106.64	69.4831	99.3506	361.525	322.93	273.788	168.155	228.417	196.061	unknown protein ;supported by full-length cDNA: Ceres:33022.
259880_at	At1g76730	2.9659	0	2.1477	0	61.921	60.2236	63.395	181.667	189.757	178.863	119.284	144.472	134.727	hypothetical protein similar to hypothetical proteins: GB:BAA79068 [Aeropyrum pernix], GB:AAB84710 [Methanobacterium thermoautotrophicum];supported by full-length cDNA: Ceres:33304.
259875_s_at	At1g76690	3.0125	0	2.1069	0	181.36	168.551	163.841	500.023	632.496	415.175	367.408	324.788	390.252	12-oxophytodienoate reductase (OPR2) identical to 12-oxophytodienoate reductase OPR2 GB:AAC78441 [Arabidopsis thaliana]
259840_at	At1g52230	8.5919	0	3.1201	0	119.379	92.3462	108.516	893.864	957.787	899.828	322.568	355.008	321.594	photosystem I subunit VI precursor identical to photosystem I subunit VI precursor [Arabidopsis thaliana] GI:5734524;supported by full-length cDNA: Ceres:1440.
259839_at	At1g52190	2.4439	0	3.7296	0	43.0067	44.3948	50.4122	127.354	97.284	112.161	179.226	180.827	153.942	peptide transporter, putative similar to peptide transporter PTR2-B SP:P46032 [Arabidopsis thaliana (Mouse-ear cress)]; supported by full-length cDNA: Ceres: 113723 and gi:16648852
259838_at	At1g52220	7.5293	0	2.6415	0	52.4659	47.6139	56.3657	429.546	423.205	325.179	126.257	142.799	144.201	unknown protein ;supported by full-length cDNA: Ceres:21305.
259832_at	At1g69580	2.063	0	2.8939	0	40.7665	40.541	46.2212	87.338	87.8036	87.9488	125.612	121.105	122.333	transfactor, putative similar to GI:4519671 from [Nicotiana tabacum]
259788_at	At1g29670	25.1783	0	3.0635	0	17.5403	23.3877	24.745	544.146	660.461	448.925	65.1826	74.0076	61.9958	lipase/hydrolase, putative contains Pfam profile: PF00657 Lipase/Acylhydrolase with GDSL-like motif;supported by full-length cDNA: Ceres:23556.
259774_at	At1g29520	2.5286	0	3.086	0	47.3478	38.2487	37.3525	101.724	112.866	96.3032	130.822	114.452	134.148	plasma membrane associated protein, putative similar to GI:6851373 from [Hordeum vulgare]
259736_at	At1g64390	2.1187	0	3.2973	0	173.53	190.106	193.33	385.401	407.823	386.823	656.914	557.311	622.248	endo-beta-1,4-glucanase, putative similar to GI:4972236 from [Fragaria x ananassa] (Plant Mol. Biol. 40, 323-332 (1999)); supported by cDNA: gi_13937172_gb_AF372940.1_AF372940
259727_at	At1g60950	4.6143	0	2.7581	0	350.214	360.096	403.338	1711.73	1758.63	1668.37	977.93	1041.96	1051.66	ferrodoxin precursor identical to FERREDOXIN PRECURSOR GB:P16972 from [Arabidopsis thaliana]; supported by cDNA: gi_13265544_gb_AF324706.2_AF324706
259707_at	At1g77490	3.4291	0	2.2201	0	33.0787	35.7733	32.8936	122.386	129.182	97.3286	72.2361	80.5789	73.0695	thylakoid-bound ascorbate peroxidase identical to thylakoid-bound ascorbate peroxidase GB:CAA67426 [Arabidopsis thaliana];supported by full-length cDNA: Ceres:157034.
259625_at	At1g42970	6.6735	0	2.1792	0	98.489	108.602	107.189	669.429	745.905	682.004	226.009	236.66	222.211	glyceraldehyde-3-phosphate dehydrogenase identical to glyceraldehyde-3-phosphate dehydrogenase GI:166708 [Arabidopsis thaliana] (Gene 104, 133-138 (1991)); supported by cDNA: gi_14517407_gb_AY039539.1_
259507_at	At1g43910	3.0804	0	5.6078	0	72.4623	68.1302	65.8098	220.284	232.019	183.502	400.439	351.807	405.221	unknown protein
259491_at	At1g15820	5.4007	0	2.1464	0	222.181	188.866	202.783	1115.76	1102.77	1096.57	391.4	466.43	459.724	chlorophyll binding protein, putative similar to chlorophyll binding protein GI:169213 from [Petunia hybrida]
259391_s_at	At1g06350	4.069	0	2.7205	0	29.3274	29.0818	37.3686	147.485	131.674	110.565	86.4619	90.1311	83.9711	delta 9 desaturase, putative similar to delta 9 desaturase GI:2970034 from [Arabidopsis thaliana]
259385_at	At1g13470	3.5042	0	7.9652	0	21.2632	19.9186	19.3218	71.9247	77.5385	62.5538	179.972	123.964	177.987	hypothetical protein predicted by genscan+
259180_at	At3g01680	4.735	0	4.5727	0	33.5055	40.9756	37.5392	181.349	192.827	156.238	194.662	144.568	173.009	unknown protein
259166_at	At3g01670	5.9922	0	5.2389	0	19.6666	22.56	22.9256	140.554	139.69	110.159	126.621	97.4034	117.303	unknown protein ; supported by cDNA: gi_16648950_gb_AY059845.1_
259040_at	At3g09270	2.9661	0	2.2509	0	28.935	33.5001	35.0126	72.5934	103.989	112.453	66.7828	71.6984	80.8623	putative glutathione transferase similar to glutathione transferase GB:CAA71784 [Glycine max];supported by full-length cDNA: Ceres:21546.
259021_at	At3g07540	2.2126	0	2.0858	0	149.082	181.564	194.47	384.048	402.672	375.144	414.903	308.866	371.522	hypothetical protein predicted by genefinder; supported by cDNA: gi_15215733_gb_AY050396.1_
258618_at	At3g02885	3.4209	0	2.6455	0	191.756	185.586	200.143	571.44	725.94	678.115	455.696	474.845	597.168	Expressed protein ; supported by cDNA: gi_1289319_gb_U53221.1_ATU53221
258607_at	At3g02730	4.6417	0	2.1809	0	59.5601	52.1852	57.9704	259.724	280.077	247.974	109.244	130.461	130.423	thioredoxin f1 identical to thioredoxin f1 GB:AF144385 [Arabidopsis thaliana];supported by full-length cDNA: Ceres:11767.
258288_at	At3g23295	12.4622	0	5.3009	0	25.9766	18.8865	33.3859	341.123	274.439	359.591	133.945	149.994	130.853	unknown protein
258285_at	At3g16140	5.0999	0	2.6713	0	219.167	156.591	192.528	938.906	951.257	1008.02	488.088	533.235	496.715	photosystem I subunit VI precursor identical to GB:CAB52749 from [Arabidopsis thaliana];supported by full-length cDNA: Ceres:9633.
258265_at	At3g15800	2.3476	0	2.4352	0	24.6153	21.5867	22.0181	56.1832	52.0847	51.8867	50.3527	56.7846	58.9902	putative beta-1,3-glucanase precursor similar to beta-1,3-glucanase precursor GB:AAD10386 [Oryza sativa]
258225_at	At3g15630	2.8362	0	4.4729	0	82.4648	88.3994	96.6005	326.715	229.002	202.879	408.822	388.072	399.454	unknown protein ; supported by cDNA: gi_15529233_gb_AY052241.1_
258087_at	At3g26060	3.8075	0	2.3965	0	133.539	131.89	134.893	531.165	555.651	437.401	302.319	321.846	335.213	putative peroxiredoxin similar to peroxiredoxin Q GB:BAA90524 from [Sedum lineare]; supported by cDNA: gi_15081742_gb_AY048264.1_
257974_at	At3g20820	3.863	0	2.0115	0	120.34	138.241	133.59	466.493	563.047	485.397	254.213	275.481	259.164	unknown protein similar to NA-DAMAGE-REPAIR/TOLERATION PROTEIN DRT100 PRECURSOR GB:Q00874 from [Arabidopsis thaliana]
257966_at	At3g19800	3.133	0	2.5638	0	46.4112	39.1059	48.4937	139.283	137.62	142.954	92.8514	129.46	121.263	unknown protein ;supported by full-length cDNA: Ceres:41112.
257832_at	At3g26740	7.3004	0	3.1739	0	117.701	110.484	125.591	903.962	947.993	730.754	363.326	373.439	386.068	light regulated protein, putative similar to light regulated protein precursor GB:Q03200 [Oryza sativa] (Plant Mol. Biol. 22 (1), 165-170 (1993)), ccr protein GB:S52663 [Citrus X paradisi] (Plant Mol. Biol. 26 (1), 165-173 (1994));supported by full-length cDNA: Ceres:41074.
257807_at	At3g26650	4.5174	0	2.4847	0	385.757	420.613	483.258	1840.16	1916.36	2069.19	1056.54	1084.58	1063.19	glyceraldehyde 3-phosphate dehydrogenase A subunit (GapA) identical to glyceraldehyde 3-phosphate dehydrogenase A subunit (GapA) GB:M64114 (Gene 104, 133-138 (1991)); supported by cDNA: gi_166701_gb_M64114.1_ATHGAPAA
257205_at	At3g16520	3.5091	0	2.5238	0	152.335	123.904	136.368	485.533	511.047	451.309	330.655	345.204	365.464	putative glucosyltransferase similar to UDP-glucose glucosyltransferase GB:X77459 [Manihot esculenta], UDP-glycose:flavonoid glycosyltransferase GB:BAA36411 [Vigna mungo]
257093_at	At3g20570	4.3797	0	5.1596	0	47.6935	52.5533	54.747	230.313	262.351	186.165	262.143	241.674	295.883	hypothetical protein ;supported by full-length cDNA: Ceres:9965.
257088_at	At3g20510	2.0128	0	2.0291	0	206.924	197.514	230.166	411.203	442.058	424.065	388.591	449.739	449.341	unknown protein
256979_at	At3g21055	11.1165	0	5.026	0	63.429	69.9694	88.8344	784.729	938.587	747.129	368.305	374.368	374.265	Expressed protein ; supported by full-length cDNA: Ceres: 38257.
256969_at	At3g21080	3.3434	0	3.4532	0	25.8798	18.5069	22.3686	76.5137	69.4908	77.1847	67.9236	83.8323	78.7629	unknown protein
256942_at	At3g23290	8.1186	0	3.9227	0	31.2836	26.9145	30.8719	276.609	211.827	234.69	109.841	132.911	106.647	hypothetical protein similar to unknown protein GB:AAC63835 from [Arabidopsis thaliana]
256926_at	At3g22540	7.4834	0	4.9194	0	60.0433	39.3521	51.0025	387.73	358.266	379.486	239.636	252.726	247.511	hypothetical protein predicted by genemark.hmm
256796_at	At3g22210	7.0261	0	3.0872	0	30.1112	29.9521	34.1357	212.496	239.979	209.38	88.3721	92.2632	110.172	hypothetical protein predicted by genscan+;supported by full-length cDNA: Ceres:4146.
256789_at	At3g13672	4.9638	0	3.5504	0	17.2323	20.6561	21.3219	85.7787	104.405	103.723	64.9232	74.2335	71.0665	seven in absentia-like protein similar to SINA1p GB:CAB40577 from [Vitis vinifera]; supported by cDNA: gi_16323493_gb_AY059135.1_
256759_at	At3g25640	4.0683	0	3.6694	0	70.5916	67.8472	73.1813	272.189	277.685	311.063	228.952	282.337	265.237	hypothetical protein predicted by genemark.hmm
256666_at	At3g20670	2.1067	0	2.0115	0	255.151	344.449	380.372	748.753	702.911	612.836	648.505	661.816	660.924	histone H2A, putative similar to histone H2A GB:AAF64418 GI:7595337 from [Arabidopsis thaliana] (Proc. Natl. Acad. Sci. U.S.A. 97 (2), 948-953 (2000));supported by full-length cDNA: Ceres:14470.
256647_at	At3g13610	2.3114	0	4.6657	0	54.8787	65.5927	75.2247	168.642	129.391	154.307	300.436	324.165	288.455	unknown protein contains similarity to DNA-binding protein zyxin GB:X99063 GI:1430882 from [Mus musculus]
256617_at	At3g22240	4.2298	0	2.1917	0	171.522	152.018	183.371	680.993	728.004	735.143	339.761	392.671	378.572	unknown protein ; supported by full-length cDNA: Ceres: 368.
256366_at	At1g66880	2.3441	0	2.652	0	116.219	99.3273	102.378	235.302	255.86	254.099	273.691	299.081	270.376	protein kinase, putative contains Pfam profile: PF00069: Eukaryotic protein kinase domain
256336_at	At1g72030	3.8815	0	2.4443	0	64.085	64.5005	73.6803	262.81	264.409	257.87	135.992	170.12	188.282	unknown protein
256309_at	At1g30380	6.0772	0	2.9837	0	369.567	290.545	356.236	2044.96	2135.01	1996.61	972.663	1035.51	1024.26	photosystem I subunit X precursor identical to photosystem I subunit X precursor [Arabidopsis thaliana] GI:5738540;supported by full-length cDNA: Ceres:27643.
256215_at	At1g50900	5.5581	0	2.548	0	78.2279	84.3732	92.5829	491.508	503.251	423.577	197.389	216.483	236.344	unknown protein ;supported by full-length cDNA: Ceres:19056.
256115_at	At1g16880	4.4942	0	2.1762	0	80.2252	89.2577	90.2297	379.347	421.7	366.141	184.831	187.315	193.044	unknown protein ; supported by cDNA: gi_14423501_gb_AF386988.1_AF386988
255997_s_at	At1g29910	3.9373	0	2.0929	0	444.966	436.209	460.877	1863.98	1865.12	1554.93	938.009	905.868	964.932	photosystem II type I chlorophyll a /b binding protein, putative similar to photosystem II type I chlorophyll a /b binding protein GI:16364 from [Arabidopsis thaliana]
255886_at	At1g20340	5.4446	0	2.4271	0	304.294	271.418	293.715	1577.17	1683.03	1473.48	657.983	715.287	736.911	plastocyanin, putative similar to plastocyanin GI:1865683 from [Arabidopsis thaliana];supported by full-length cDNA: Ceres:23406.
255809_at	At4g10300	2.3903	0	2.0833	0	189.184	199.018	218.071	468.085	502.666	478.439	392.716	457.82	412.486	putative protein predicted protein, Arabidopsis thaliana; supported by full-length cDNA: Ceres: 1489.
255720_at	At1g32060	10.7523	0	2.814	0	35.3458	35.7577	40.2644	408.615	403.61	385.235	98.1992	114.325	100.868	phosphoribulokinase precursor identical to phosphoribulokinase precursor GB:P25697 GI:125576 from [Arabidopsis thaliana];supported by full-length cDNA: Ceres:11226.
255652_at	At4g00950	2.4253	0	2.7311	0	26.2473	33.5389	32.9117	88.4135	65.5494	70.8598	81.2293	92.6187	79.3191	putative protein
255457_at	At4g02770	5.558	0	3.439	0	144.535	107.535	140.935	706.98	813.417	663.92	421.979	430.813	498.737	putative photosystem I reaction center subunit II precursor similar to spinach PSI-D, GenBank accession number P12353;supported by full-length cDNA: Ceres:7630.
255440_at	At4g02530	4.7434	0	2.3049	0	58.6642	56.7531	62.3248	297.028	302.491	243.577	122.414	136.676	150.587	predicted protein of unknown function ; supported by full-length cDNA: Ceres: 8114.
255435_at	At4g03280	4.5883	0	2.217	0	257.321	242.893	289.923	1169.3	1237.59	1218.46	549.678	602.941	599.154	putative component of cytochrome B6-F complex ; supported by cDNA: gi_13926181_gb_AF370566.1_AF370566
255381_at	At4g03510	2.5408	0	3.9086	0	57.142	56.9527	57.7593	177.699	136.816	122.137	210.657	222.562	238.485	RMA1 RING zinc finger protein identical to RMA1 gi:3164222; supported by cDNA: gi_3164221_dbj_AB008518.1_AB008518
255290_at	At4g04640	5.9464	0	2.9587	0	179.639	141.233	156.185	899.327	917.79	1019.67	475.076	490.081	446.318	coded for by A. thaliana cDNA AA041141 ;supported by full-length cDNA: Ceres:6687.
255248_at	At4g05180	13.0245	0	2.4499	0	91.3094	73.387	83.1061	1113.85	1133.45	980.195	196.239	213.641	197.199	Oxygen-evolving enhancer protein 3 precursor - like protein OXYGEN-EVOLVING ENHANCER PROTEIN 3 PRECURSOR (OEE3) (16 KD SUBUNIT OF OXYGEN-EVOLVING SYSTEM OF PHOTOSYSTEM II), Spinacia oleracea, gb:P12301;supported by full-length cDNA: Ceres:40326.
255111_at	At4g08780	2.5934	0	2.363	0	101.709	139.196	140.865	290.934	336.505	362.641	311.01	316.316	274.801	peroxidase C2 precursor like protein peroxidase (EC 1.11.1.7) C2 precursor - Armoracia rusticana,PID:d1014846
254975_at	At4g10500	2.4154	0	4.9364	0	31.3843	29.8574	28.1713	66.2227	70.5371	79.2111	155.838	158.341	127.198	putative Fe(II)/ascorbate oxidase SRG1 protein - Arabidopsis thaliana, PIR2:S44261
254970_at	At4g10340	4.5798	0	2.3859	0	511.214	457.293	470.813	2203.97	2242.62	2145.28	1062.54	1200.7	1170.88	chlorophyll a/b-binding protein - like chlorophyll a/b-binding protein CP26 in PS II, Brassica juncea, gb:X95727;supported by full-length cDNA: Ceres:39765.
254818_at	At4g12470	23.8221	0	2.9327	0	19.2651	21.5824	23.5114	534.359	559.963	438.845	67.0056	65.4373	56.3013	pEARLI 1-like protein Arabidopsis thaliana pEARLI 1 mRNA, PID:g871780
254816_at	At4g12440	2.1791	0	3.4522	0	28.3351	34.3955	41.7564	69.7939	89.3596	68.5293	103.711	114.593	142.408	putative adenine phosphoribosyltransferase adenine phosphoribosyltransferase 1 - Arabidopsis thaliana, PIR2:S20867
254803_at	At4g13100	2.7503	0	3.3779	0	21.6756	25.775	22.3544	59.3468	69.366	63.2747	73.3441	75.9106	86.5369	putative protein several hypothetical proteins - Arabidopsis thaliana
254790_at	At4g12800	7.0129	0	3.0039	0	177.019	140.664	158.278	1084.37	1152.59	1100.93	457.832	488.71	483.215	probable photosystem I chain XI precursor photosystem I chain XI precursor - spinach, PIR2:S35151;supported by full-length cDNA: Ceres:34400.
254764_at	At4g13250	3.7084	0	2.6611	0	66.5269	68.0749	76.5993	274.318	261.555	247.342	174.262	209.142	178.625	putative protein ; supported by cDNA: gi_16323185_gb_AY057697.1_
254632_at	At4g18630	2.8697	0	2.9121	0	17.7409	25.4153	21.671	57.2908	68.4588	60.2857	68.0386	60.4757	60.2693	putative protein predicted protein, Arabidopsis thaliana
254543_at	At4g19810	4.7562	0	3.0057	0	32.8714	22.9068	27.7555	128.792	133.804	134.705	70.8117	92.803	87.463	putative chitinase chitinase (EC 3.2.1.14) / lysozyme (EC 3.2.1.17) PZ precursor, pathogenesis-related, common tobacco, PIR2:S51591
254515_at	At4g20270	2.3577	0	3.6026	0	60.2073	59.7739	69.175	147.807	161.335	136.823	255.925	207.3	218.228	CLV1 receptor kinase like protein CLAVATA1 receptor kinase, Arabidopsis th., PATX:G2160756
254490_at	At4g20320	2.4156	0	3.5892	0	60.1611	59.8314	49.6724	156.118	125.074	128.648	218.098	184.424	206.442	CTP synthase like protein CTP synthase, Methanococcus jannaschii,PIR2:E64446
254460_at	At4g21210	2.9935	0	3.5425	0	34.656	27.3939	27.8596	94.3394	91.9866	82.8144	107.654	89.6672	121.182	putative protein sigma70 operon, Staphylococcus aureus, PATCHX:D1020251
254402_at	At4g21310	2.2692	0	2.6914	0	46.5855	38.2412	39.856	91.8737	104.044	87.0118	104.319	104.295	126.96	putative protein predicted protein, Arabidopsis thaliana
254398_at	At4g21280	7.4331	0	3.1328	0	86.9922	79.5771	90.4445	651.752	639.229	619.434	258.265	268.825	278.081	photosystem II oxygen-evolving complex protein 3 - like photosystem II oxygen-evolving complex protein 3, Spinacia oleracea, PIR2:S00008;supported by full-length cDNA: Ceres:5691.
254333_at	At4g22753	6.608	0	2.3396	0	40.7671	35.0148	35.5703	240.647	259.335	235.833	78.9908	81.4644	100.061	predicted protein predicted protein ERG25, Saccharomyces cerevisiae, PIR2:S64354
254217_at	At4g23720	2.7296	0	2.6168	0	76.5305	63.5365	57.61	175.394	193.545	170.631	152.346	170.648	194.291	putative protein other hypothetical proteins, Arabidopsis thaliana
254137_at	At4g24930	4.5191	0	2.2605	0	59.99	52.2541	57.4893	256.079	263.892	247.066	119.968	130.304	133.41	hypothetical protein
254102_at	At4g25050	6.9056	0	2.1996	0	104.736	91.5242	93.9654	699.845	720.68	583.667	197.872	210.222	230.298	acyl carrier - like protein acyl carrier protein, Cuphea lanceolata, PIR2:S42026;supported by full-length cDNA: Ceres:11559.
253875_at	At4g27520	2.766	0	2.2141	0	206.921	217.838	221.384	579.93	585.487	621.818	482.267	469.212	479.17	putative protein ENOD20 gene, Medicago truncatula, X99467;supported by full-length cDNA: Ceres:33380.
253871_at	At4g27440	8.8092	0	3.5486	0	60.003	57.481	54.1026	492.979	534.493	484.062	195.444	216.327	197.116	protochlorophyllide reductase precursor ;supported by full-length cDNA: Ceres:36741.
253860_at	At4g27700	4.7906	0	2.163	0	39.7168	38.2269	37.7206	180.76	197.352	175.988	76.3851	83.4221	90.3721	hypothetical protein ;supported by full-length cDNA: Ceres:14002.
253815_at	At4g28250	4.4615	0	3.6125	0	116.939	104.419	93.8823	410.68	512.241	483.515	370.76	362.132	405.92	putative beta-expansin/allergen protein soybean pollen allergen (cim1) protein - soybean, PIR2:S48032;supported by full-length cDNA: Ceres:33023.
253814_at	At4g28290	5.7704	0	2.824	0	55.6768	60.9838	68.3043	346.061	361.789	359.47	171.342	152.684	198.306	putative protein ;supported by full-length cDNA: Ceres:10077.
253806_at	At4g28270	3.2855	0	2.8195	0	100.656	100.189	85.4836	322.74	334.497	283.488	271.09	256.824	279.385	putative protein Arabidopsis thaliana RMA1 mRNA, PID:d1029538
253790_at	At4g28660	4.2599	0	2.2364	0	97.8023	83.1365	77.2804	373.077	402.52	324.398	176.159	190.754	210.56	photosystem II protein W - like photosystem II protein W, Porphyra purpurea, PIR2:S73268; supported by full-length cDNA: Ceres: 2419.
253749_at	At4g29080	4.2181	0	4.5545	0	143.573	103.56	152.628	524.225	561.305	600.718	557.602	657.433	605.661	phytochrome-associated protein PAP2 ; supported by cDNA: gi_12083213_gb_AF332402.1_AF332402
253738_at	At4g28750	8.3191	0	3.2201	0	155.349	158.84	172.98	1344.33	1415.35	1293.13	487.361	560.801	520.572	photosystem I subunit PSI-E - like protein photosystem I chain IV precursor, Hordeum vulgare, PIR1:F1BH4; supported by cDNA: gi_11692883_gb_AF324694.1_AF324694
253627_at	At4g30650	8.2831	0	2.4996	0	54.5571	87.3614	100.107	626.467	806.619	571.643	196.114	180.192	228.667	low temperature and salt responsive protein homolog low temperature and salt responsive protein LTI6A - Arabidopsis thaliana,PID:g4039153
253414_at	At4g33050	3.0779	0	2.8736	0	27.3384	24.0498	24.3606	73.3937	88.5931	71.1577	73.3575	70.3509	73.9666	putative protein
253272_at	At4g34190	3.887	0	2.1484	0	98.4124	105.266	106.655	413.16	418.697	374.422	214.381	218.565	233.769	putative protein ;supported by full-length cDNA: Ceres:8742.
253238_at	At4g34480	2.0467	0	2.2874	0	66.2306	59.1827	59.8186	126.835	112.187	140.093	136.684	144.646	142.369	putative protein (fragment)
253045_at	At4g37445	4.1423	0	4.2774	0	23.3379	21.1897	21.1258	101.25	96.0251	74.682	89.483	86.357	104.984	Expressed protein ; supported by full-length cDNA: Ceres: 17990.
253010_at	At4g37750	4.0729	0	4.3045	0	68.0972	62.6888	63.5422	272.033	295.849	223.593	282.429	249.84	304.21	ovule development protein aintegumenta (ANT) ; supported by cDNA: gi_1171428_gb_U44028.1_ATU44028
253009_at	At4g37930	4.9522	0	3.1689	0	127.863	114.103	133.326	578.892	650.984	628.644	393.665	381.068	414.521	glycine hydroxymethyltransferase like protein glycine hydroxymethyltransferase -Solanum tuberosum,PID:g438247;supported by full-length cDNA: Ceres:33799.
252958_at	At4g38620	5.0245	0	2.2328	0	32.0893	35.099	36.2499	183.048	176.858	159.824	67.7005	81.9849	81.2719	putative transcription factor (MYB4) ; supported by cDNA: gi_3941411_gb_AF062860.1_AF062860
252943_at	At4g39330	6.7265	0	2.1408	0	97.6302	85.5089	94.0592	679.76	609.928	574.896	192.999	211.473	188.957	cinnamyl-alcohol dehydrogenase CAD1 ;supported by full-length cDNA: Ceres:34593.
252929_at	At4g38970	24.9477	0	2.9448	0	69.84	44.2776	61.8019	1430.48	1463.67	1494.63	164.992	171.224	181.836	putative fructose-bisphosphate aldolase fructose-bisphosphate aldolase (EC 4.1.2.13)- rice, PIR2:T02057; supported by cDNA: gi_16226652_gb_AF428455.1_AF428455
252763_at	At3g42725	2.4347	0	3.5974	0	86.0973	56.7776	63.3101	152.938	177.141	171.912	219.232	261.438	261.055	Expressed protein ; supported by cDNA: gi_15292972_gb_AY050920.1_
252688_at	At3g44020	4.6358	0	2.506	0	32.3318	23.3417	29.3675	124.793	150.188	119.251	62.4404	73.0968	77.5789	putative protein
252533_at	At3g46110	2.0745	0	3.2778	0	31.0558	37.4949	34.1253	76.1082	78.0767	58.8209	99.7704	108.216	128.57	putative protein predicted proteins, Arabidopsis thaliana
252463_at	At3g47070	7.856	0	2.6762	0	32.3107	26.9226	36.8344	242.341	290.192	222.177	79.077	87.8755	90.1458	putative protein ;supported by full-length cDNA: Ceres:25829.
252421_at	At3g47540	4.6189	0	2.9535	0	103.251	97.6674	96.7359	422.155	458.61	494.068	261.844	284.539	332.753	endochitinase-like protein BASIC ENDOCHITINASE CHB4 PRECURSOR - Brassica napus, SWISSPROT:CHI4_BRANA
252409_at	At3g47650	5.7582	0	2.5223	0	155.408	156.76	182.663	977.906	981.175	890.269	390.697	432.764	424.635	putative protein bundle sheath defective protein 2 - Zea mays, EMBL:AF126742; supported by cDNA: gi_13877966_gb_AF370246.1_AF370246
252377_at	At3g47960	2.9861	0	2.246	0	35.4509	43.9745	41.448	104.542	130.476	125.924	94.8122	90.1478	86.5245	putative peptide transporter peptide transporter (ptr1), Hordeum vulgare, AF023472; supported by cDNA: gi_13877878_gb_AF370202.1_AF370202
252277_at	At3g49470	2.1869	0	2.0531	0	149.742	135.739	148.654	323.43	328.747	297.22	270.73	309.553	311.038	alpha NAC-like protein Nascent polypeptide associated complex protein alpha subunit - Drosophila melanogaster, EMBL:AF017783; supported by cDNA: gi_13899100_gb_AF370545.1_AF370545
252179_at	At3g50760	2.2626	0	2.1442	0	28.5847	27.1882	28.0346	61.1096	62.7262	65.7894	56.149	61.5266	62.0251	putative protein UDP-glucose:(glucosyl) LPS alpha1,3-glucosyltransferase WaaO, E.coli, EMBL:AF019746
252130_at	At3g50820	5.7112	0	2.5238	0	110.452	86.2233	93.5993	540.229	566.998	550.576	210.659	247.976	273.96	putative protein 1 photosystem II oxygen-evolving complex photosystem II oxygen-evolving complex protein 1 - potato, PIR2:S16586;supported by full-length cDNA: Ceres:95531.
252116_at	At3g51510	3.494	0	2.011	0	78.6732	63.0504	72.8981	256.355	255.456	238.072	112.835	157.681	161.094	putative protein ;supported by full-length cDNA: Ceres:10009.
251941_at	At3g53470	3.2077	0	2.5304	0	37.4786	31.6485	31.2882	113.738	107.785	100.582	76.8291	92.1028	85.1582	putative protein ribosomal protein S25, cytosolic, Arabidopsis thaliana, PIR:T08568
251885_at	At3g54050	7.1151	0	3.0896	0	24.7009	22.34	22.8907	162.531	179.184	155.858	66.2118	70.6212	79.2268	fructose-bisphosphatase precursor ; supported by cDNA: gi_14532619_gb_AY039934.1_
251814_at	At3g54890	5.9638	0	2.8095	0	237.667	217.658	241.255	1452.09	1320.83	1381.35	629.659	646.678	680.707	chlorophyll a/b-binding protein ; supported by cDNA: gi_13265500_gb_AF324692.2_AF324692
251762_at	At3g55800	5.9272	0	2.7356	0	69.6445	59.9975	77.4459	394.343	435.07	398.041	186.122	186.464	193.917	sedoheptulose-bisphosphatase precursor ; supported by cDNA: gi_15451177_gb_AY054669.1_
251759_at	At3g55630	3.7185	0	2.1932	0	32.0674	23.954	26.3534	106.514	109.017	90.7784	55.5918	64.1856	60.8888	tetrahydrofolylpolyglutamate synthase precursor - like protein tetrahydrofolylpolyglutamate synthase precursor, Mus musculus, PIR:S65755; supported by full-length cDNA: Ceres: 230791.
251752_at	At3g55740	2.2619	0	2.066	0	21.4517	27.166	33.012	60.0472	67.3423	57.249	55.8883	57.7356	55.0247	proline transporter 2
251735_at	At3g56090	4.5914	0	2.5708	0	117.151	129.763	156.868	570.797	644.448	638.675	325.992	372.985	339.074	putative protein ferritin 2 precursor - Vigna unguiculata, PIR:T08124;supported by full-length cDNA: Ceres:33282.
251705_at	At3g56400	3.2511	0	10.4387	0	50.7779	57.3318	62.8325	205.226	182.424	168.099	606.582	633.506	544.332	DNA-binding protein-like DNA-binding protein 4 WRKY4 - Nicotiana tabacum, EMBL:AF193771;supported by full-length cDNA: Ceres:34847.
251664_at	At3g56940	4.1408	0	2.1532	0	206.966	213.387	209.35	949.402	814.726	843.36	434.059	449.967	471.84	leucine zipper-containing protein AT103 ; supported by cDNA: gi_1033194_gb_U38232.1_ATU38232
251555_at	At3g58780	2.2177	0	2.3126	0	60.3836	58.0661	51.8522	127.977	120.977	128.725	141.648	140.924	111.276	shatterproof 1 (SHP1)/ agamous -like 1 (AGL1) ; supported by full-length cDNA: Ceres: 22339.
251519_at	At3g59400	7.8532	0	2.8937	0	35.0968	34.4592	41.2772	286.699	311.984	271.711	99.6044	107.184	113.931	putative protein hypothetical protein 238 - Porphyra purpurea, PIR:S73123
251365_at	At3g61310	2.9049	0	2.0566	0	195.758	175.26	174.796	548.417	530.596	506.505	373.249	394.906	354.385	putative DNA-binding protein At2g33620 AT-hook DNA-binding protein - Arabidopsis thaliana, EMBL:ATAC2332
251325_s_at	At3g61470	5.4679	0	2.5341	0	321.56	269.302	310.961	1722.13	1583.04	1625.87	707.462	833.941	743.865	Lhca2 protein ;supported by full-length cDNA: Ceres:123159.
251287_at	At3g61820	2.0039	0	2.0534	0	598.941	550.949	537.171	1035.97	1272.36	1072.38	1113.56	1117.25	1233.41	putative protein nucleoid DNA-binding protein cnd41, chloroplast - Nicotiana tabacum, EMBL:D26015; supported by cDNA: gi_14532549_gb_AY039899.1_
251243_at	At3g61870	6.1714	0	2.9875	0	45.8575	37.908	42.8383	256.824	275.879	248.623	112.084	133.776	132.368	putative protein hypothetical protein - Synechocystis sp. (strain PCC 6803), PIR:S75899; supported by cDNA: gi_16648774_gb_AY058164.1_
251113_at	At5g01370	2.6912	0	2.5655	0	46.0583	48.8972	47.1201	127.608	151.332	103.407	126.698	113.683	124.113	hypothetical protein
251109_at	At5g01600	11.2862	0	2.0752	0	87.6008	132.074	161.135	1201.51	1321.35	1775.03	241.189	286.945	262.116	ferritin 1 precursor ;supported by full-length cDNA: Ceres:1100.
251082_at	At5g01530	5.4204	0	2.2592	0	287.878	274.521	281.931	1489.24	1538.3	1549.07	605.79	658.09	643.668	chlorophyll a/b-binding protein CP29 ; supported by cDNA: gi_15081738_gb_AY048262.1_
251059_at	At5g01810	2.13	0	2.1134	0	203.975	218.911	260.24	447.825	506.126	501.108	476.51	468.184	499.006	serine/threonine protein kinase ATPK10 ; supported by cDNA: gi_13249133_gb_AF302111.1_AF302111
251036_at	At5g02160	4.6076	0	5.7359	0	19.6439	15.7405	18.9349	91.9919	89.8832	68.4076	90.9362	114.765	105.868	putative protein ; supported by cDNA: gi_13358223_gb_AF325034.2_AF325034
251031_at	At5g02120	5.9325	0	4.4155	0	54.8761	48.8198	55.7645	305.605	350.299	290.09	217.83	218.254	268.007	one helix protein (OHP) ;supported by full-length cDNA: Ceres:16704.
251021_at	At5g02140	2.6955	0	4.6516	0	28.5898	33.5186	31.3202	79.6758	90.3881	81.7749	143.97	149.425	141.194	thaumatin-like protein thaumatin-like protein SCUTL2 - Vitis vinifera, EMBL:AF195654
250967_at	At5g02790	2.1844	0	5.1276	0	112.532	125.752	126.669	282.693	276.29	238.232	606.355	633.055	631.941	putative protein In2, Zea mays, EMBL:X58573;supported by full-length cDNA: Ceres:13224.
250798_at	At5g05340	2.018	0	2.2136	0	64.966	62.211	71.1568	132.55	146.638	121.053	115.647	126.242	197.146	peroxidase
250565_at	At5g08000	3.3181	0	3.1813	0	131.97	119.81	124.718	422.237	435.75	391.278	369.425	387.041	441.289	putative protein various predicted proteins, Arabidopsis thaliana; supported by full-length cDNA: Ceres: 33347.
250563_at	At5g08050	3.7323	0	2.4316	0	95.596	113.846	129.453	403.046	431.669	430.128	252.635	280.882	290.536	putative protein predicted protein, Arabidopsis thaliana
250498_at	At5g09660	11.2795	0	2.3121	0	34.7211	32.4874	34.812	377.242	403.281	370.218	66.2697	86.326	83.2888	microbody NAD-dependent malate dehydrogenase ; supported by cDNA: gi_14335145_gb_AY037252.1_
250187_at	At5g14370	2.7273	0	2.2974	0	81.307	72.2198	80.0815	207.535	229.255	200.334	160.492	188.164	188.026	putative protein predicted proteins, Arabidopsis thaliana;supported by full-length cDNA: Ceres:19906.
250160_at	At5g15210	2.8861	0	2.1659	0	31.6155	34.1836	33.3225	96.059	108.268	81.748	66.2376	69.9807	78.4663	putative protein various predicted proteins, Arabidopsis thaliana
250073_at	At5g17170	6.7487	0	2.7006	0	39.7729	46.3648	42.1649	262.853	311.494	291.528	105.307	122.076	119.114	unknown protein ; supported by cDNA: gi_14334891_gb_AY035119.1_
250058_at	At5g17870	3.6474	0	2.5043	0	147.921	115.347	151.489	496.311	566.132	450.321	330.594	322.698	385.371	plastid-specific ribosomal protein 6 precursor (Psrp-6) - like plastid-specific ribosomal protein 6 precursor (Psrp-6), Spinacia oleracea, EMBL:AF245292;supported by full-length cDNA: Ceres:267004.
250007_at	At5g18670	2.7216	0	2.8405	0	59.0362	46.0238	45.111	173.724	89.484	145.503	147.77	158.891	119.893	beta-amylase-like proten beta-amylase - Prunus armeniaca, EMBL:AF139501;supported by full-length cDNA: Ceres:30798.
250002_at	At5g18690	2.266	0	2.7434	0	54.3536	56.544	62.3837	114.316	151.969	126.365	157.304	150.041	168.03	proline-richh protein predicted protein F24P17.17 - Arabidopsis thaliana, EMBL:AC011623
249958_at	At5g18970	4.2493	0	5.1951	0	24.4272	28.2146	27.6929	105.152	132.544	103.674	132.688	131.526	153.136	plasma membrane associated protein -like plasma membrane associated protein, Hordeum vulgare, EMBL:AF218627;supported by full-length cDNA: Ceres:107988.
249919_at	At5g19250	2.3552	0	2.164	0	233.319	237.388	223.315	540.322	609.283	484.988	503.969	476.276	521.616	putative protein predicted protein, Arabidopsis thaliana
249917_at	At5g22460	3.0831	0	3.5461	0	130.265	151.96	175.021	422.612	509.476	477.646	543.056	555.527	522.876	putative protein strong similarity to unknown protein (gb|AAF31728.1); supported by cDNA: gi_15292740_gb_AY050804.1_
249894_at	At5g22580	4.5807	0	2.6247	0	81.9026	96.2888	110.565	470.343	434.535	417.84	263.818	239.621	254.472	unknown protein ; supported by cDNA: gi_14190416_gb_AF378886.1_AF378886
249862_at	At5g22920	3.2362	0	4.021	0	331.694	301.227	271.797	1051.87	927.386	948.636	1217.4	1209.92	1210.54	PGPD14 protein ;supported by full-length cDNA: Ceres:41666.
249810_at	At5g23920	5.2583	0	2.2209	0	58.6154	53.6191	57.6949	269.754	330.378	293.401	113.867	134.467	129.054	unknown protein
249778_at	At5g24165	6.6593	0	2.8548	0	140.336	114.207	158.339	820.647	933.888	994.97	366.548	424.374	387.78	Expressed protein ; supported by full-length cDNA: Ceres: 19092.
249718_at	At5g35740	2.489	0	2.4906	0	49.5673	41.4076	44.5536	121.569	120.443	95.3215	106.221	107.101	124.224	putative protein contains similarity to beta-1,3-glucanase;supported by full-length cDNA: Ceres:11830.
249694_at	At5g35790	4.5751	0	2.2413	0	57.3527	49.4877	50.6128	241.514	239.688	239.161	110.195	126.445	116.267	glucose-6-phosphate dehydrogenase ;supported by full-length cDNA: Ceres:22483.
249658_s_at	At5g36700	17.2812	0	4.4722	0	18.5233	14.6749	18.6932	317.914	302.954	275.878	69.6696	75.8007	86.5962	N-glyceraldehyde-2-phosphotransferase-like
249482_at	At5g38980	22.2117	0	12.3596	0	40.6868	30.1262	33.9554	808.002	833.279	685.807	432.253	412.992	449.655	putative protein ;supported by full-length cDNA: Ceres:115913.
249332_at	At5g40980	2.63	0	3.9964	0	35.8377	36.1038	40.1547	90.7624	110.463	93.5881	146.006	139.975	161.996	putative protein similar to unknown protein (gb AAF03445.1)
249331_at	At5g40950	3.0894	0	4.1778	0	80.7064	106.132	103.231	300.482	332.975	262.673	396.053	388.735	427.074	50S ribosomal protein L27 ;supported by full-length cDNA: Ceres:152076.
249234_at	At5g42200	7.4057	0	3.0756	0	134.096	152.901	181.525	1136.39	1213.13	1120.2	437.825	475.597	527.583	putative protein similar to unknown protein (gb|AAF16660.1);supported by full-length cDNA: Ceres:4267.
249231_at	At5g42030	2.0062	0	2.3732	0	78.1246	91.5863	91.0129	178.352	188.817	155.883	188.19	199.067	231.485	putative protein similar to unknown protein (emb|CAB66408.1);supported by full-length cDNA: Ceres:106836.
249211_at	At5g42680	2.5842	0	2.6409	0	35.8952	22.7555	31.5572	81.4407	72.5634	79.1087	69.1134	88.7921	80.3217	putative protein similar to unknown protein (pir||T09377)
249046_at	At5g44400	12.6994	0	5.0291	0	19.2195	13.6663	17.4952	197.374	245.657	196.779	79.3252	75.2879	98.7604	berberine bridge enzyme
248912_at	At5g45670	2.8851	0	2.3239	0	98.371	102.34	115.147	307.384	316.661	287.222	247.09	246.11	240.807	GDSL-motif lipase/hydrolase-like protein ;supported by full-length cDNA: Ceres:18389.
248855_at	At5g46590	2.8618	0	9.0949	0	20.2659	25.0328	21.6847	70.9778	66.6211	54.0909	204.883	194.742	209.584	NAM-like
248763_at	At5g47550	3.2662	0	2.2756	0	148.053	138.697	202.25	500.768	595.691	500.737	344.61	386.548	381.607	putative protein similar to unknown protein (pir||H71431);supported by full-length cDNA: Ceres:31680.
248491_at	At5g51010	4.3536	0	2.3038	0	79.1283	69.175	75.8577	331.428	337.099	307.391	161.486	186.034	168.903	unknown protein ;supported by full-length cDNA: Ceres:27885.
248348_at	At5g52190	3.7768	0	2.5708	0	24.4376	21.0862	23.9147	82.5831	92.9432	86.7295	53.2493	65.7081	59.5539	putative protein similar to unknown protein (sp|P42404);supported by full-length cDNA: Ceres:15004.
248277_at	At5g52860	3.175	0	3.6626	0	45.1139	33.5612	31.4584	109.856	123.935	115.878	134.115	138.632	130.627	ABC transporter-like protein
248263_at	At5g53370	3.5108	0	2.5813	0	114.913	97.1384	95.2364	352.98	343.721	382.122	225.457	298.338	269.393	pectinesterase ; supported by cDNA: gi_15293286_gb_AY051077.1_
248230_at	At5g53830	2.1401	0	3.1567	0	195.284	179.817	171.646	379.199	411.286	379.604	538.346	581.256	606.31	putative protein similar to unknown protein (gb|AAF34839.1); supported by cDNA: gi_13926341_gb_AF372918.1_AF372918
248227_at	At5g53820	2.8008	0	2.186	0	67.7791	77.7205	99.6489	224.013	257.506	205.095	172.797	154.133	208.961	ABA-inducible protein-like ;supported by full-length cDNA: Ceres:24640.
248224_at	At5g53490	4.5981	0	2.4274	0	40.0499	34.0892	39.8702	184.891	182.555	156.781	80.2903	90.0955	106.357	thylakoid lumenal 17.4 kD protein, chloroplast precursor (P17.4) (sp|P81760) ; supported by cDNA: gi_13899114_gb_AF370552.1_AF370552
248151_at	At5g54270	3.6047	0	2.0942	0	383.478	360.561	371.41	1387.95	1376.35	1256.56	728.834	768.176	838.984	Lhcb3 chlorophyll a/b binding protein (gb|AAD28773.1) ; supported by cDNA: gi_13926338_gb_AF372917.1_AF372917
248128_at	At5g54770	6.7113	0	5.2168	0	233.309	156.268	174.837	1321.53	1314.75	1151.66	940.052	1028.9	975.468	thiazole biosynthetic enzyme precursor (ARA6) (sp Q38814) ; supported by cDNA: gi_1113782_gb_U17589.1_ATU17589
247813_at	At5g58330	3.7342	0	2.3888	0	187.673	162.189	172.502	623.488	694.098	633.008	401.219	419.07	427.534	NADP-dependent malate dehydrogenase ;supported by full-length cDNA: Ceres:25200.
247643_at	At5g60450	2.0901	0	2.0892	0	73.6252	76.2532	95.4399	162.728	169.949	180.051	194.611	162.91	155.006	auxin response factor 4 ; supported by cDNA: gi_4102597_gb_AF013466.1_AF013466
247443_at	At5g62720	9.3989	0	2.4173	0	48.0678	33.666	34.3286	390.031	360.274	340.558	97.0946	90.6135	92.8548	putative protein predicted proteins, Arabidopsis thaliana; supported by full-length cDNA: Ceres: 38273.
247397_at	At5g62940	2.7225	0	2.5066	0	58.018	46.8979	55.5202	149.076	159.905	127.803	128.515	142.284	131.351	Dof zinc finger protein - like Dof zinc finger protein, Oryza sativa, EMBL:AB028129
247320_at	At5g64040	9.8337	0	2.7827	0	80.3622	71.5627	75.7698	762.39	760.16	716.538	188.239	234.006	211.371	photosystem I reaction centre subunit psaN precursor (PSI-N) (sp P49107) ; supported by cDNA: gi_1237123_gb_U32176.1_ATU32176
247097_at	At5g66460	2.0436	0	4.3225	0	76.3396	63.9808	61.0794	124.451	147	140.123	260.73	290.88	318.933	mannan endo-1,4-beta-mannosidase
247073_at	At5g66570	4.4144	0	2.3223	0	358.448	341.381	346.658	1592.71	1623.78	1403.14	796.771	799.268	834.247	33 kDa polypeptide of oxygen-evolving complex (OEC) in photosystem II (emb|CAA75629.1) ;supported by full-length cDNA: Ceres:37218.
247049_at	At5g66440	2.302	0	2.8249	0	120.598	161.621	161.117	333.144	379.197	308.211	421.892	417.755	412.733	putative protein similar to unknown protein (pir||T05276); supported by cDNA: gi_15292834_gb_AY050851.1_
247047_at	At5g66650	3.4493	0	2.061	0	41.6417	40.3131	40.9464	162.834	129.688	131.396	88.8166	86.6963	77.7888	putative protein contains similarity to unknown protein (gb AAC17084.1); supported by cDNA: gi_14596230_gb_AY042903.1_
246792_at	At5g27290	2.5756	0	2.4566	0	32.9524	29.552	25.2561	68.307	78.9174	78.8142	64.4052	76.5768	74.6118	putative protein predicted proteins, Arabidopsis thaliana;supported by full-length cDNA: Ceres:38304.
246652_at	At5g35190	7.8189	0	5.7468	0	12.2093	10.4052	13.0748	101.54	89.6638	87.8478	66.7494	66.8142	71.5365	extensin -like protein extensin, soybean, PIR:T06782
246597_at	At5g14760	3.3977	0	2.6189	0	32.7612	38.1925	35.1457	112.138	120.922	127.431	99.3393	85.5899	92.9296	L-aspartate oxidase -like protein L-aspartate oxidase, Pseudomonas aeruginosa, PIR:T46863; supported by cDNA: gi_15010649_gb_AY045626.1_
246387_at	At1g77400	3.0847	0	3.2085	0	18.983	22.0822	22.6044	63.2466	73.0663	60.0918	65.1115	62.4319	76.7375	hypothetical protein predicted by genscan+
246376_at	At1g51950	2.8833	0	2.0338	0	87.5213	125.57	115.434	339.966	312.055	295.207	208.099	245.887	214.18	auxin regulated protein IAA18, putative similar to auxin regulated protein IAA18 GI:2618725 from [Arabidopsis thaliana];supported by full-length cDNA: Ceres:6493.
246270_at	At4g36500	3.3988	0	2.1855	0	23.2207	30.2361	29.5681	98.0288	106.778	77.3808	57.6013	58.5433	65.3099	putative protein
246238_at	At4g36670	7.8657	0	4.5699	0	28.7839	27.8789	27.1224	220.859	246.275	191.896	131.151	116.828	134.908	sugar transporter like protein
246036_at	At5g08370	2.833	0	2.059	0	159.968	191.11	203.337	477.029	619.568	474.084	375.634	405.841	360.077	alpha-galactosidase - like protein alpha-galactosidase, coffee, PIR:T50781;supported by full-length cDNA: Ceres:156141.
245912_at	At5g19600	3.9299	0	2.1622	0	28.9613	27.1843	24.6517	107.933	105.752	103.838	60.1767	54.7304	59.7888	putative protein sulfate transporter ATST1 [imported] - Arabidopsis thaliana, PIR:T48901; supported by cDNA: gi_14141683_dbj_AB061739.1_AB061739
245881_at	At5g09460	2.1567	0	2.8101	0	75.2238	71.9598	68.9738	145.44	165.111	155.628	206.468	205.394	195.567	putative protein
245806_at	At1g45474	3.0844	0	3.514	0	83.2527	71.9456	74.684	237.451	245.011	226.579	248.586	295.891	263.333	light-harvesting complex protein similar to light-harvesting complex protein GI:22752 from [Pinus sylvestris];supported by full-length cDNA: Ceres:41745.
245725_at	At1g73370	2.9729	0	3.2438	0	27.2717	30.0237	28.6477	92.8464	91.5563	71.0974	98.3108	86.8369	93.6303	sucrose synthase, putative similar to sucrose synthase GI:4468151 from [Craterostigma plantagineum]
245612_at	At4g14440	2.3985	0	2.4895	0	156.548	132.741	165.44	328.805	370.185	391.684	358.511	404.237	369.295	carnitine racemase like protein
245576_at	At4g14770	2.557	0	2.0956	0	57.1559	58.7203	60.6768	153.868	153.936	143.648	130.457	115.123	124.409	hypothetical protein
245388_at	At4g16410	3.6616	0	2.2991	0	111.232	93.4238	99.5982	371.962	401.003	341.08	203.781	254.705	241.036	hypothetical protein ;supported by full-length cDNA: Ceres:2505.
245354_at	At4g17600	4.1957	0	2.1077	0	43.1971	42.7768	54.3003	197.676	201.39	189.489	89.6644	105.794	100.201	Lil3 protein ;supported by full-length cDNA: Ceres:29150.
245347_at	At4g14890	6.4285	0	2.5759	0	41.7879	42.9881	47.5398	296.335	312.01	242.245	98.2758	111.81	130.74	ferredoxin ;supported by full-length cDNA: Ceres:22861.
245329_at	At4g14365	2.1798	0	3.5068	0	52.9015	54.5897	47.9518	120.539	107.246	111.046	172.863	187.252	184.992	Expressed protein ; supported by full-length cDNA: Ceres: 37809.
245213_at	At1g44575	5.9324	0	3.4284	0	214.204	159.895	177.847	1055.06	1104.92	1114.41	580.327	704.623	607.354	photosystem II 22kDa protein, putative similar to photosystem II 22kDa protein GI:21306 from [Spinacia oleracea]; supported by cDNA: gi_15294225_gb_AF410304.1_AF410304
245195_at	At1g67740	3.9827	0	2.194	0	266.785	244.743	254.924	1005.1	1072.19	975.264	518.287	568.412	594.907	F12A21.13 putative photosystem II Core Complex sp|049347|PSBY_ARATH; similar to ESTs gb|BE523181, dbj|AV531372.1, dbj|AV527826.1, dbj AV520274.1, dbj|AV522153.1, dbj|AV530317.1, dbj|AV526312.1, dbj|AV527090.1, dbj|AV521148.1, and dbj|AV531908.1;supported by full-l
245108_at	At2g41510	3.8585	0	2.2557	0	142.432	115.397	125.811	486.581	500.355	493.356	320.119	297.023	248.222	putative cytokinin oxidase
245096_at	At2g40880	3.7464	0	2.7979	0	25.1308	32.7488	36.4348	114.355	131.792	107.192	76.8332	81.8547	105.193	putative cysteine proteinase inhibitor B (cystatin B) ;supported by full-length cDNA: Ceres:11739.
245050_at	psbK	3.6077	0	3.9421	0	106.346	75.0569	134.359	424.042	440.652	274.473	416.086	575.31	253.358	PSII K protein
245044_at	At2g26500	5.8189	0	3.3959	0	187.958	175.526	234.25	1225.98	1192.33	1059.83	625.951	668.063	735.81	unknown protein Alternative splice forms exist.;supported by full-length cDNA: Ceres:9368.
245023_at	psbI	2.9665	0	2.6816	0	80.9582	54.8961	99.0152	243.456	281.185	172.101	223.877	265.474	140.482	PSII I protein
245001_at	psbM	4.0334	0	11.091	0	40.9489	66.9169	72.4371	218.956	281.677	226.594	704.65	657.994	637.09	PSII low MW protein
244976_at	petB	3.3027	0	2.3152	0	258.026	216.911	249.501	830.314	778.395	783.877	620.572	558.328	498.336	cytochrome B6
244975_at	psbH	3.9314	0	2.6534	0	75.5251	77.5515	87.9878	370.416	297.187	280.124	244.171	219.023	176.45	PSII 10KDa phosphoprotein
